# Supplementary material for: Influence of Tryptophan Contained in 1-Methyl-Tryptophan on Antimicrobial and Immunoregulatory Functions of Indoleamine 2,3-Dioxygenase
Source: PubMed Central journal article supplement (PMC3441469; doi:10.1371/journal.pone.0044797), 2012-09-13
Supplement: pone.0044797.s001.pdf [file pone.0044797.s001.pdf]

## Supplemental figure S1

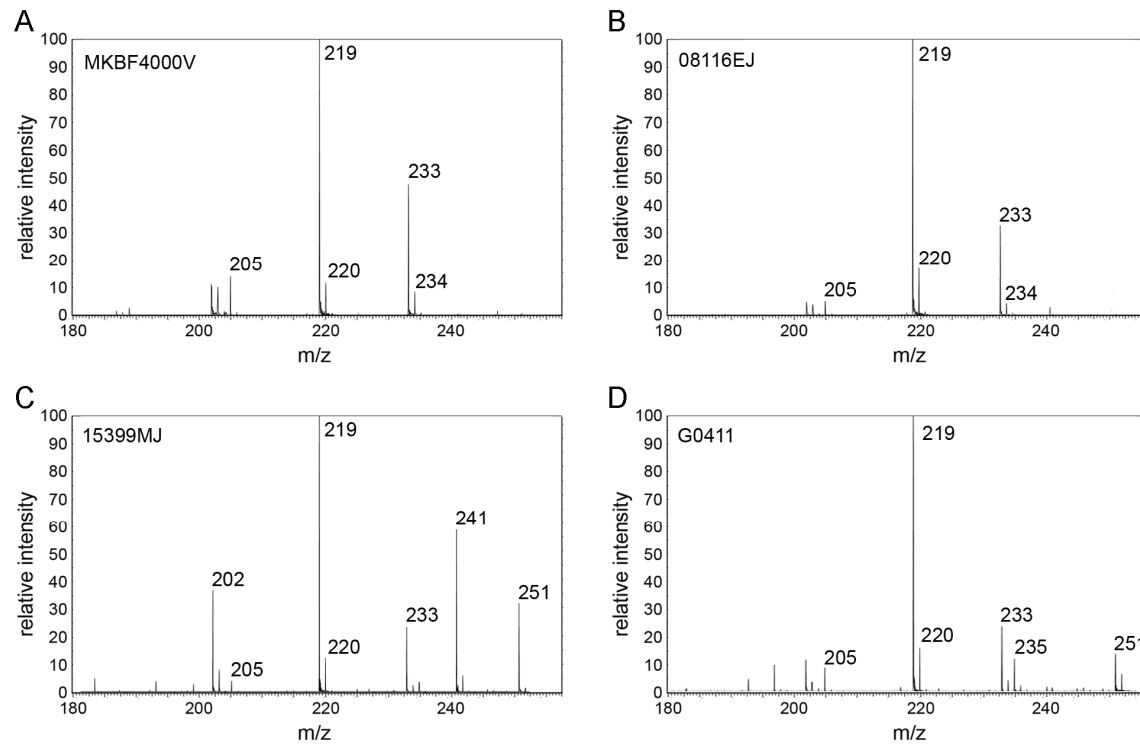

**Figure S1. MS Analysis of different 1-L-MT lots dissolved in tryptophan-free cell culture medium.** Exemplary spectra of the lots (A) MKBF4000V, (B) 08116EJ, (C) 15399MJ (all derived from Sigma Aldrich, St. Louis, USA) and (D) G0411 (derived from Santa Cruz Biotechnology Inc., Santa Cruz, USA). Additional to 1-L-MT with the m/z of 219, all lots also contain tryptophan with the m/z of 205.
