# Supplementary material for: Influence of Tryptophan Contained in 1-Methyl-Tryptophan on Antimicrobial and Immunoregulatory Functions of Indoleamine 2,3-Dioxygenase
Source: PubMed Central journal article supplement (PMC3441469; doi:10.1371/journal.pone.0044797), 2012-09-13
Supplement: pone.0044797.s002.pdf [file pone.0044797.s002.pdf]

## Supplemental figure S2

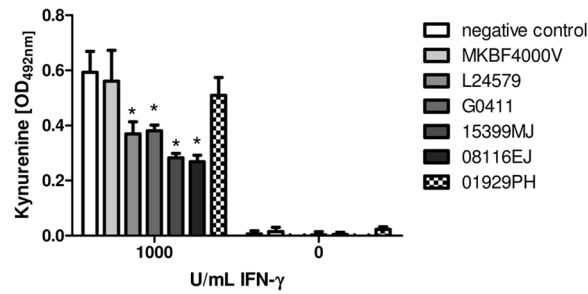

**Figure S2. Impact of tryptophan contamination in 1-L-MT on IDO inhibitory function.** Measurement of kynurenine in the supernatant of IFN- $\gamma$ -stimulated (1000 U/mL) or unstimulated 86HG39 glioblastoma cells cultured in IMDM medium with additional 100  $\mu$ g/mL L-tryptophan for 72 h. During this stimulation period, the cells were treated with different 1-L-MT or 1-D-MT lots (600  $\mu$ g/mL each). The kynurenine content in the cell culture supernatants was determined by optical density at 492 nm  $\pm$  SEM, using Ehrlich's reagent. A significant inhibition of kynurenine production ( $p < 0.05$ ) as compared to the negative control is marked with an asterisk (\*)  $n = 3$ .
