# Supplementary material for: Influence of Tryptophan Contained in 1-Methyl-Tryptophan on Antimicrobial and Immunoregulatory Functions of Indoleamine 2,3-Dioxygenase
Source: PubMed Central journal article supplement (PMC3441469; doi:10.1371/journal.pone.0044797), 2012-09-13
Supplement: pone.0044797.s003.pdf [file pone.0044797.s003.pdf]

### Supplemental figure S3

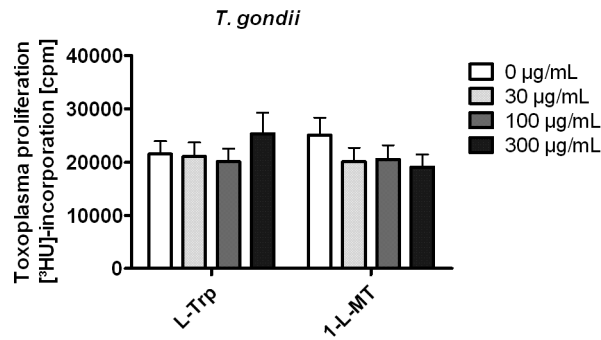

**Figure S3. *Toxoplasma gondii* proliferation in IMDM medium with additional L-tryptophan or 1-L-MT.** The proliferation of *Toxoplasma gondii* in tryptophan-containing IMDM medium with additional L-tryptophan or 1-L-MT (100 µg/mL each) was determined. The supplementation of the substrates had no negative effect on parasite growth. Data are given as [<sup>3</sup>H] uracil incorporation +/- SEM of four independent experiments, each performed in triplicates.
