# Supplementary material for: Influence of Tryptophan Contained in 1-Methyl-Tryptophan on Antimicrobial and Immunoregulatory Functions of Indoleamine 2,3-Dioxygenase
Source: PubMed Central journal article supplement (PMC3441469; doi:10.1371/journal.pone.0044797), 2012-09-13
Supplement: pone.0044797.s004.pdf [file pone.0044797.s004.pdf]

## Supplemental figure S4

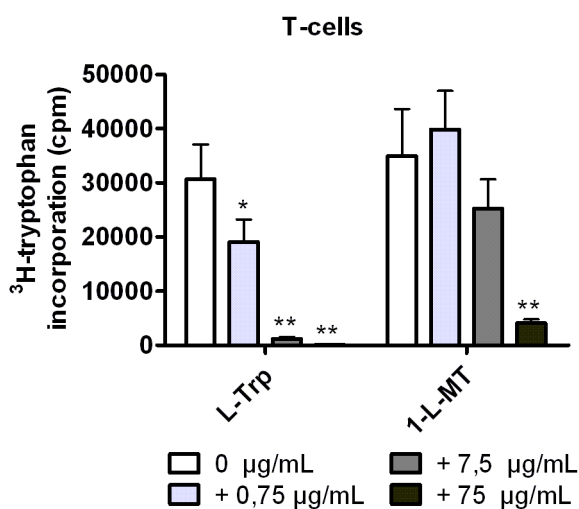

**Figure S4. Competitive replacement of [<sup>3</sup>H] L-tryptophan by unlabelled L-tryptophan and 1-L-MT in human T cells.** OKT3-stimulated T cells were cultured in conditioned, tryptophan-free cell culture medium containing 0,75 µg/mL [<sup>3</sup>H] L-tryptophan and additional L-tryptophan and 1-L-MT (0-75 µg/mL each). The [<sup>3</sup>H] L-tryptophan was detected by liquid scintillation spectrometry. Its incorporation into T cells was significantly decreased in a concentration-dependent way, when it was competitively replaced by unlabelled L-tryptophan and 1-L-MT. Data are given as [<sup>3</sup>H]-tryptophan incorporation, measured by liquid scintillation spectrometry, +/- SEM of four independent experiments with each experiment performed in triplicates.
