# Supplementary material for: Influence of Tryptophan Contained in 1-Methyl-Tryptophan on Antimicrobial and Immunoregulatory Functions of Indoleamine 2,3-Dioxygenase
Source: PubMed Central journal article supplement (PMC3441469; doi:10.1371/journal.pone.0044797), 2012-09-13
Supplement: pone.0044797.s005.pdf [file pone.0044797.s005.pdf]

**Supplemental table S1. Tryptophan-containing peptides identified by mass spectrometry.**

| Sequence                        | Protein accession | protein description                                                                         | Trp Mascot Score | 1-L-MT Mascot-Score |
|---------------------------------|-------------------|---------------------------------------------------------------------------------------------|------------------|---------------------|
| <i>Staphylococcus aureus</i>    |                   |                                                                                             |                  |                     |
| ANEDESQWNSLLEK                  | Q5HG77            | Transketolase<br>OS= <i>Staphylococcus aureus</i><br>(strain COL)                           | n.i.             | 102                 |
| VAAWYDNEMSYTAQLVR               | Q5HHP5            | Glyceraldehyde-3-phosphate<br>dehydrogenase 1<br>OS= <i>Staphylococcus aureus</i>           | 73               | 98                  |
| WYVIDAEGQTLGR                   | A7X5B4            | 50S ribosomal protein L13<br>OS= <i>Staphylococcus aureus</i>                               | n.i.             | 68                  |
| SQQVWVESVQSSK                   | A7X659            | Immunoglobulin-binding<br>protein sbi OS= <i>Staphylococcus aureus</i>                      | 56               | 59                  |
| NEDWQLYTAGK                     | Q5HCU5            | Probable malate:quinone<br>oxidoreductase 2<br>OS= <i>Staphylococcus aureus</i>             | 35               | 58                  |
| IGETHEGASQMDWMEQEQR             | A6QEJ9            | Elongation factor G<br>OS= <i>Staphylococcus aureus</i>                                     | n.i.             | 55                  |
| EATGDNWDGLGR                    | Q2FI18            | Probable quinol oxidase<br>subunit 1 OS= <i>Staphylococcus aureus</i>                       | 45               | 53                  |
| SSIVVVGTTQWGDEGK                | P65884            | Adenylosuccinate synthetase<br>OS= <i>Staphylococcus aureus</i>                             | n.i.             | 46                  |
| GAFPTWLAPK                      | A6U2F0            | Threonyl-tRNA synthetase<br>OS= <i>Staphylococcus aureus</i>                                | n.i.             | 46                  |
| VVYDITSKPPSTIEWE                | A7WY93            | GMP synthase [glutamine-<br>hydrolyzing]<br>OS= <i>Staphylococcus aureus</i>                | 45               | 45                  |
| YFDDDDMWNK                      | A6U2F0            | Threonyl-tRNA synthetase<br>OS= <i>Staphylococcus aureus</i>                                | n.i.             | 33                  |
| SVVIAYEPIWAIGTGK                | A7WZS8            | Triosephosphate isomerase<br>OS= <i>Staphylococcus aureus</i>                               | 63               | n.i.                |
| LGYDQVLWLDGVEQK                 | Q5HIC1            | Probable branched-chain-<br>amino-acid aminotransferase<br>OS= <i>Staphylococcus aureus</i> | 84               | n.i.                |
| VAAADTIYPFTQAENVWLPNK           | P0A0A1            | Pyruvate dehydrogenase E1<br>component subunit beta<br>OS= <i>Staphylococcus aureus</i>     | 38               | n.i.                |
| <i>Streptococcus agalactiae</i> |                   |                                                                                             |                  |                     |
| FSWISTGGGASMELEGK               | A2RCM1            | Phosphoglycerate kinase<br>OS= <i>Streptococcus agalactiae</i>                              | n.i.             | 92                  |
| YADTDWGSINSMGLPNK               | Q3K2G4            | Dihydroorotate dehydrogenase<br>OS= <i>Streptococcus agalactiae</i>                         | 84               | 81                  |
| ADIDYAWEEADTTYGK                | Q3K3W3            | 30S ribosomal protein S3<br>OS= <i>Streptococcus agalactiae</i>                             | n.i.             | 81                  |
| TSVVVVGTTQWGDEGK                | C0ZA40            | Adenylosuccinate synthetase                                                                 | 53               | 73                  |

|                        |        |                                                                                      |      |      |
|------------------------|--------|--------------------------------------------------------------------------------------|------|------|
|                        |        | OS= <i>Streptococcus agalactiae</i>                                                  |      |      |
| NLGWDIISTGGTK          | B5XJ20 | Bifunctional purine biosynthesis protein purH<br>OS= <i>Streptococcus agalactiae</i> | n.i. | 65   |
| AIGPEPWNAAYVEPSR       | Q038U2 | Glycyl-tRNA synthetase alpha subunit OS= <i>Streptococcus agalactiae</i> PE=3 SV=1 - | 71   | 62   |
| GQFGDVWIEFTPNEEGK      | Q3JZB5 | Elongation factor G<br>OS= <i>Streptococcus agalactiae</i>                           | n.i. | 57   |
| WYVVDATDVPLGR          | Q1WSC2 | 50S ribosomal protein L13<br>OS= <i>Streptococcus agalactiae</i>                     | 46   | 56   |
| VEADANNWETFVVPDNLVGGRR | Q3K2Y2 | Glucose-6-phosphate isomerase OS= <i>Streptococcus agalactiae</i>                    | n.i. | 54   |
| GAPEGWVAPVK            | Q3K3W2 | 50S ribosomal protein L16<br>OS= <i>Streptococcus agalactiae</i>                     | n.i. | 52   |
| QQAENLANWAK            | Q8E0Z9 | Single-stranded DNA-binding protein 3 OS= <i>Streptococcus agalactiae</i>            | 46   | 51   |
| AFFEIINWVK             | P0A4J3 | Superoxide dismutase [Mn/Fe]<br>OS= <i>Streptococcus agalactiae</i>                  | n.i. | 49   |
| WVNAAEVTEDNIK          | Q3K3S2 | CTP synthase<br>OS= <i>Streptococcus agalactiae</i>                                  | 64   | n.i. |
| SSIVVVGTTQWGDEGK       | P65884 | Adenylosuccinate synthetase<br>OS= <i>Staphylococcus aureus</i>                      | 53   | n.i. |

**Protein extracts from bacteria were analyzed by LC-MS.** Mascot-Scores for the identified tryptophan-containing peptides are given for bacteria grown in the presence of L-Tryptophan (Trp) and bacteria grown in the presence of 1-L-MT. n.i.: not identified. All searches were carried out with methylation of tryptophan residues as variable modifications. No peptide with tryptophan methylation was identified in any sample.
