# Supplementary material for: Influence of Tryptophan Contained in 1-Methyl-Tryptophan on Antimicrobial and Immunoregulatory Functions of Indoleamine 2,3-Dioxygenase
Source: PubMed Central journal article supplement (PMC3441469; doi:10.1371/journal.pone.0044797), 2012-09-13
Supplement: pone.0044797.s006.pdf [file pone.0044797.s006.pdf]

**Supplemental table S2. Tryptophan-containing peptides identified by mass spectrometry.**

| Sequence                  | Protein accession | protein description                                                 | Trp Mascot Score | 1-L-MT Mascot-Score |
|---------------------------|-------------------|---------------------------------------------------------------------|------------------|---------------------|
| <b>Glioblastoma-cells</b> |                   |                                                                     |                  |                     |
| LISWYDNEFGYSNR            | P04406            | Glyceraldehyde-3-phosphate dehydrogenase OS= <i>Homo sapiens</i>    | 91               | n.i.                |
| VVLAYEPVWAIGTGK           | P60174            | Triosephosphate isomerase OS= <i>Homo sapiens</i>                   | 84               | n.i.                |
| TVIIQSWGSPK               | P10809            | 60 kDa heat shock protein, mitochondrial OS= <i>Homo sapiens</i>    | 74               | n.i.                |
| VGWEQLLTTIAR              | P12814            | Alpha-actinin-1 OS= <i>Homo sapiens</i>                             | 74               | n.i.                |
| DSPSVWAAVPGK              | P07737            | Profilin-1 OS= <i>Homo sapiens</i>                                  | 67               | 68                  |
| AWGPGLEGGVVGK             | P21333            | Filamin-A OS= <i>Homo sapiens</i>                                   | 64               | 66                  |
| FFPLESWQIGK               | P30046            | D-dopachrome decarboxylase OS= <i>Homo sapiens</i>                  | 60               | n.i.                |
| VADIGLAAWGR               | P23526            | Adenosylhomocysteinase OS= <i>Homo sapiens</i>                      | 54               | n.i.                |
| SADTLWDIQK                | P07195            | L-lactate dehydrogenase B chain OS= <i>Homo sapiens</i>             | 54               | 54                  |
| <b>HeLa Cells</b>         |                   |                                                                     |                  |                     |
| LISWYDNEFGYSNR            | P04406            | Glyceraldehyde-3-phosphate dehydrogenase OS= <i>Homo sapiens</i> GN | 95               | 91                  |
| VVLAYEPVWAIGTGK           | P60174            | Triosephosphate isomerase OS= <i>Homo sapiens</i>                   | 84               | 80                  |
| DSPSVWAAVPGK              | P07737            | Profilin-1 OS= <i>Homo sapiens</i>                                  | 49               | 71                  |
| SADTLWDIQK                | P07195            | L-lactate dehydrogenase B chain OS= <i>Homo sapiens</i>             | n.i.             | 58                  |
| FNVWDTAGQEK               | P62826            | GTP-binding nuclear protein Ran OS= <i>Homo sapiens</i>             | n.i.             | 57                  |
| FFVGGNWK                  | P60174            | Triosephosphate isomerase OS= <i>Homo sapiens</i>                   | n.i.             | 47                  |
| MPILGLGTWK                | P15121            | Aldose reductase OS= <i>Homo sapiens</i>                            | 50               | n.i.                |
| SADTLWDIQK                | P00338            | L-lactate dehydrogenase A chain OS= <i>Homo sapiens</i>             | 49               | n.i.                |
| DDGSAVIWVTFK              | Q14019            | Coactosin-like protein OS= <i>Homo sapiens</i>                      | 70               | n.i.                |
| SIQLDGLVWGASK             | P29692            | Elongation factor 1-delta OS= <i>Homo sapiens</i>                   | 67               | n.i.                |
| ALPFWNEEIVPQIK            | P15259            | Phosphoglycerate mutase 2 OS= <i>Homo sapiens</i>                   | 53               | n.i.                |
| NSSYFVEWIPNNVK            | P07437            | Tubulin beta chain OS= <i>Homo sapiens</i>                          | 52               | n.i.                |

|                       |        |                                                                  |    |      |
|-----------------------|--------|------------------------------------------------------------------|----|------|
| WGDAGAEYVVESTGVFTTMEK | P04406 | Glyceraldehyde-3-phosphate dehydrogenase OS= <i>Homo sapiens</i> | 59 | n.i. |
|-----------------------|--------|------------------------------------------------------------------|----|------|

**Protein extracts from human cells were analysed by LC-MS.** Mascot-Scores for the identified tryptophan-containing peptides are given for cells grown in the presence of L-Tryptophan (Trp) and cells grown in the presence of 1-L-MT. n.i.: not identified. All searches were carried out with methylation of tryptophan residues as variable modifications. No peptide with tryptophan methylation was identified in any sample.
